# Supplementary material for: Effects of an Advocacy Trial on Food Industry Salt Reduction Efforts—An Interim Process Evaluation
Source: MDPI journal article supplement (doi:10.3390/nu9101128), 2017-10-17
Supplement: s1 [file s1]

Figure S1 Intervention program logic model

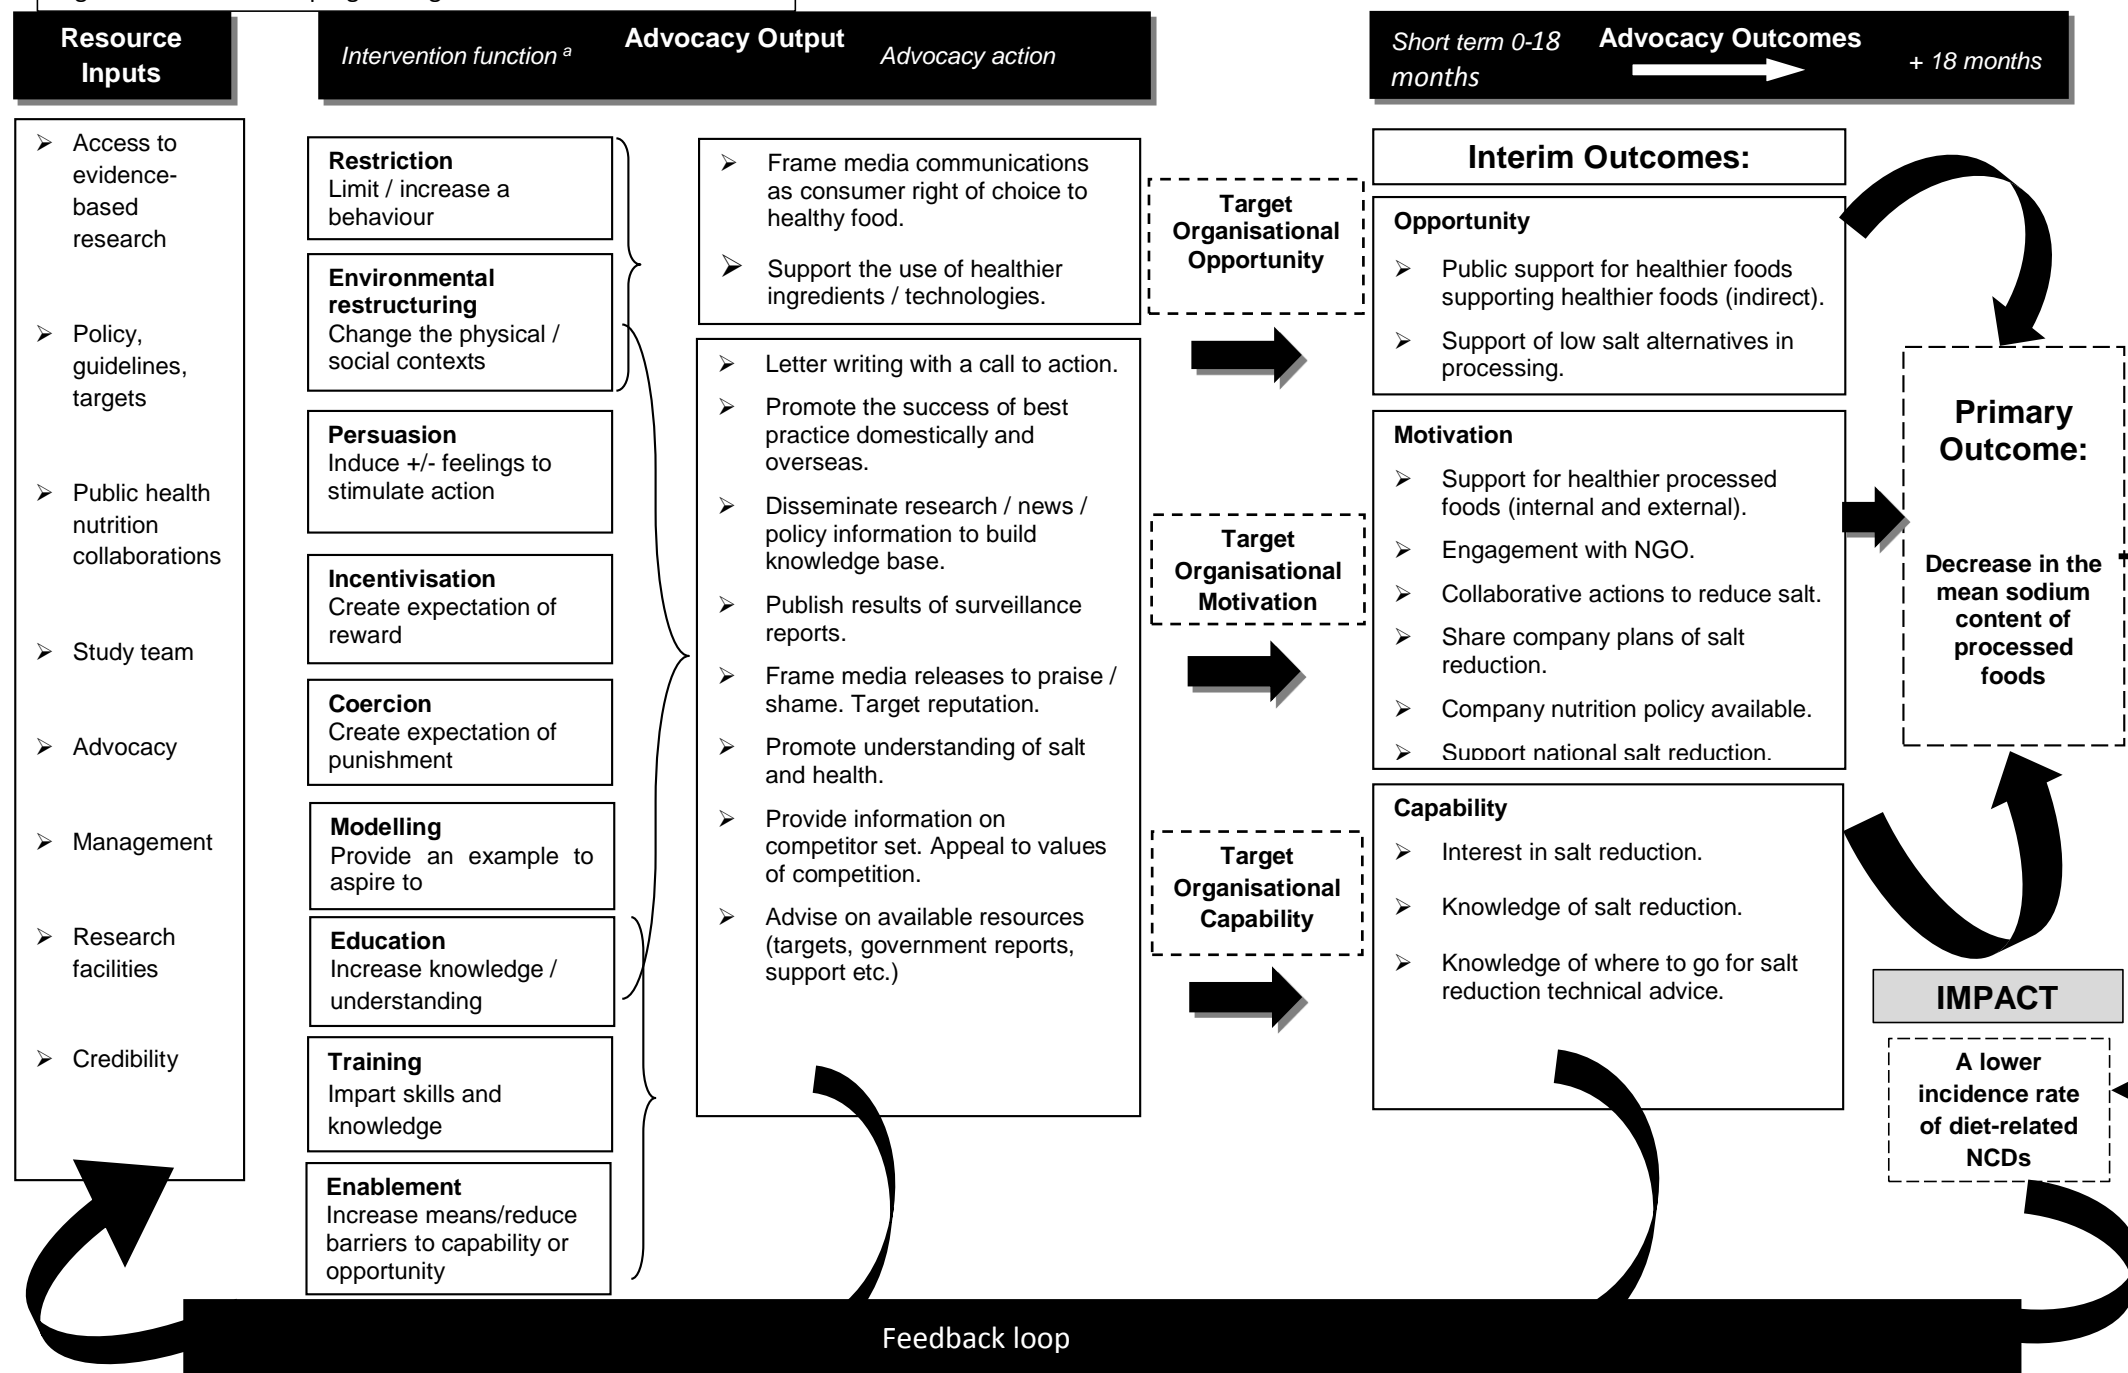

<sup>a</sup>Adapted from Michie S, van Stralen M, West R. The Behaviour change wheel a new method for characterising and designing behaviour change interventions. Implement Sci. 2011;6:42
